1 Article

2 **Genetic characterization of a recombinant myxoma virus leap into the**  
3 **Iberian hare (*Lepus granatensis*)**

4 Ana Águeda-Pinto<sup>1,2,3</sup>, Ana Lemos de Matos<sup>3</sup>, Mário Abrantes<sup>3</sup>, Simona Kraberger<sup>4</sup>, Maria A.  
5 Risalde<sup>5</sup>, Christian Gortázar<sup>6</sup>, Grant McFadden<sup>3</sup>, Arvind Varsani<sup>4,7</sup>, Pedro J. Esteves<sup>1,2,8</sup>

6

7 <sup>1</sup> CIBIO/InBio - Centro de Investigação em Biodiversidade e Recursos Genéticos, Universidade do Porto,  
8 Campus Agrário de Vairão, Portugal

9 <sup>2</sup> Departamento de Biologia, Faculdade de Ciências, Universidade do Porto, Porto, Portugal

10 <sup>3</sup> Center for Immunotherapy, Vaccines, and Virotherapy (CIVV), The Biodesign Institute, Arizona State  
11 University, Tempe, Arizona, United States of America

12 <sup>4</sup> The Biodesign Center for Fundamental and Applied Microbiomics, Center for Evolution and Medicine and  
13 School of Life sciences, Arizona State University, Tempe, United States of America

14 <sup>5</sup> Dpto. de Anatomía y Anatomía Patológica Comparadas, Universidad de Córdoba, Agrifood Excellence  
15 International Campus (ceiA3), Córdoba, Spain.

16 <sup>6</sup> Instituto de Investigación en Recursos Cinegéticos IREC-CSIC-UCLM-JCCM, Ronda de Toledo, Ciudad  
17 Real, Spain

18 <sup>7</sup> Structural Biology Research Unit, Department of Clinical Laboratory Sciences, University of Cape Town,  
19 Cape Town, Western Cape, South Africa

20 <sup>8</sup> CITS - Centro de Investigação em Tecnologias da Saúde, IPSN, CESPU, Gandra, Portugal

21

22 Emails:

23 Ana Águeda-Pinto – [anaagueda@cibio.up.pt](mailto:anaagueda@cibio.up.pt)

24 Ana Lemos de Matos – [alemosde@asu.edu](mailto:alemosde@asu.edu)

25 Mário Abrantes – [mruidias@asu.edu](mailto:mruidias@asu.edu)

26 Simona Kraberger – [simona.kraberger@asu.edu](mailto:simona.kraberger@asu.edu)

27 Maria A. Risalde – [MariaA.Risalde@uclm.es](mailto:MariaA.Risalde@uclm.es)

28 Christian Gortázar – [Christian.Gortazar@uclm.es](mailto:Christian.Gortazar@uclm.es)

29 Grant McFadden – [grantmcf@asu.edu](mailto:grantmcf@asu.edu)

30 Arvind Varsani – [Arvind.Varsani@asu.edu](mailto:Arvind.Varsani@asu.edu)

31 Pedro J. Esteves - [pjesteves@cibio.up.pt](mailto:pjesteves@cibio.up.pt)

32

33 Corresponding author: Pedro J. Esteves - [pjesteves@cibio.up.pt](mailto:pjesteves@cibio.up.pt)

34 GenBank Accession #: MK836424

35 Keywords: poxvirus, Myxoma virus, recombinant virus, *Lepus granatensis*

36 **Abstract**

37 Myxomatosis is a lethal disease of wild European and domestic rabbits (*Oryctolagus cuniculus*)  
38 caused by a Myxoma virus (MYXV) infection, a leporipoxvirus that is found naturally in some  
39 *Sylvilagus* rabbit species in South America and California. The introduction of MYXV in the early  
40 1950s into feral European rabbit populations in Australia and Europe demonstrate the best  
41 documented field example of host-virus coevolution following a cross-species transmission.  
42 Recently, a new cross-species jump of MYXV has been suggested in both Great Britain and  
43 Spain, where European brown hares (*Lepus europaeus*) and Iberian hares (*Lepus granatensis*)  
44 were found dead with lesions consistent with those observed in myxomatosis. To investigate the  
45 possibility of a new cross-species transmission event by MYXV, tissue samples collected from a  
46 wild Iberian hare found dead in Spain (Toledo region) were analyzed and deep sequenced. Our  
47 results report a new MYXV strain (MYXV Toledo) in the tissues of this species. The genome of  
48 this new strain encodes three disrupted genes (*M009L*, *M036L* and *M152R*) and a novel 2.8 KB  
49 recombinant region that resulted from an insertion of four novel poxviral genes towards the 5' end  
50 of its genome. From the open reading frames inserted into the MYXV Toledo strain, a new  
51 orthologue of a poxvirus host range gene family member was identified which is related to the  
52 MYXV gene *M064R*. Overall, we confirmed the identity of a new MYXV strain in Iberian hares that  
53 we hypothesize was able to more effectively counteract the host defenses in hares and start an  
54 infectious process in this new host.

## 55 Introduction

56 Myxoma virus (MYXV), a poxvirus belonging to the *Leporipoxvirus* genus, is the etiological  
57 agent of myxomatosis which is a highly lethal viral disease of wild and domestic European rabbits  
58 (*Oryctolagus cuniculus*) [1]. The classical form of the disease is characterized by systemic spread  
59 of the virus, overwhelming the immune system, and the development of secondary skin lesions  
60 called 'myxomas' [2, 3]. Mortality rate varies between 20-100%, according to the grade of  
61 virulence of the MYXV strain [3]. The virus has its natural host in the South American tapeti, or  
62 forest rabbit (*Sylvilagus brasiliensis*), where it causes an innocuous and localized cutaneous  
63 fibroma at the inoculation site [2]. Related poxviruses to MYXV are found in other *Sylvilagus*  
64 species in North America: the Californian MYXV strains, for which the natural host is *Sylvilagus*  
65 *bachmani* (brush rabbit), and rabbit fibroma virus (RFV) found in *Sylvilagus floridanus* (eastern  
66 cottontail) [2, 4]. MYXV not appearing to cause significant clinical disease in the natural *Sylvilagus*  
67 hosts, though being highly pathogenic to the naive *Oryctolagus* host, made it a classic example  
68 of a pathogen that is highly virulent in a new host species with no evolutionary history of adaptation  
69 to that pathogen.

70

71 In 1950, with the urge of controlling the infesting population of European rabbits in  
72 Australia, a MYXV strain originally isolated in Brazil (standard laboratory strain [SLS]) was used  
73 as a biological agent [1]. The release in France in 1952 of a different Brazilian isolate of MYXV  
74 (Lausanne [Lu] strain) resulted in the establishment and spread of MYXV in Europe, including the  
75 United Kingdom (UK) [5]. After an initial massive reduction of the wild rabbit populations (>99%)  
76 in both Continents, a substantial decline in the case fatality rates occurred as a result of natural  
77 selection for slightly attenuated viruses, but also due to an increased resistance to myxomatosis  
78 in the rabbit populations [4, 6, 7]. It has been recently shown that the convergent phenotype of  
79 viral resistance observed in Australia, France and UK rabbit populations was followed by a strong  
80 pattern of parallel evolution, a consequence of selection acting on standing genetic variation that  
81 was present in the ancestral rabbit populations in continental Europe [8].

82

83 The susceptibility of other leporids species to MYXV has been tested in controlled  
84 experiments, while evidence of myxomatosis in wild leporid populations have been seldom  
85 reported. Using a California MYXV strain four different North American *Sylvilagus* species (*S.*  
86 *audubonii*, *S. floridanus*, *S. idahoensis* [now *Brachylagus idahoensis*] and *S. nuttallii*) developed  
87 tumors following mosquito transfers, but these failed to be mosquito-infective lesions [9]. Three  
88 of these *Sylvilagus* species (*S. audubonii*, *S. floridanus* and *S. nuttallii*) when infected with the

89 Brazilian Lu strain also developed prominent tumors, however this time the South American strain  
90 produced mosquito-infective lesions [10]. On the other hand, black-tailed jackrabbits (*Lepus*  
91 *californicus*) inoculated with Californian MYXV did not form tumors [9]. In wild populations of  
92 European hare (*Lepus europaeus*) cases of myxomatosis have been reported sporadically and in  
93 small number. In the past, the confirmation of the disease arose from injecting rabbits with tissues  
94 from dead hares and replicating its typical clinical symptoms [11]. Most recently, in 2014, for the  
95 first time a case of myxomatosis in a European brown hare in Great Britain was confirmed using  
96 electron microscopy and a PCR of a skin lesion [12].

97

98           Recently, in late summer-fall of 2018, the first cases of myxomatosis in Spanish wild  
99 Iberian hare (*Lepus granatensis*) populations were reported, mainly in the Andalusia and Castilla-  
100 La Mancha regions. The Spanish Ministry of Agriculture, Fisheries and Food, and the Institute for  
101 Game and Wildlife Research identified what appeared to be a cross-species transmission into a  
102 new leporid species. Iberian hares were found in moribund state, with signs of blindness,  
103 weakness and disorientation, and consequently analyzed in different laboratories. Here, using  
104 culturing and deep sequencing, we genetically characterize for the first time a recombinant MYXV  
105 isolated from an Iberian hare carcass exhibiting classical symptoms of myxomatosis collected in  
106 Toledo province, Spain during the 2018 outbreak (referred to as MYXV Toledo).

## 107 **Methods**

### 108 **Sampling and pathology**

109 An adult Iberian hare (*L. granatensis*) female, was found dead on 21st of August 2018 in La Villa  
110 de Don Fabrique municipality in the Toledo province of Spain. The hare manifested lesions  
111 compatible with myxomatosis in European rabbits (Figure 1) and was completely emaciated  
112 (kidney fat index = 0). On arrival at the laboratory, duplicate samples (4mm diameter) were taken  
113 from eyelid, ear and vulva and stored in RNAlater and without preservative, at -80°C. For the  
114 histopathological study, representative samples of the main organs and tissues, were fixed in  
115 10% buffered formalin for 48-72 hours at 22±2°C, and then, dehydrated in a graded series of  
116 ethanol, immersed in xylol, and embedded in paraffin wax using an automatic processor. Sections  
117 were cut at 4 µm and stained with hematoxylin and eosin (H&E), following standard procedures.

118

### 119 **Cell lines**

120 European rabbit RK13 kidney epithelial cells (Millipore Sigma, USA) were maintained in  
121 Dulbecco's modified Eagle medium (HyClone, USA) supplemented with 10% fetal bovine serum  
122 (FBS), 2 mM L-glutamine, and 100 U/ml of penicillin/streptomycin. Cells were maintained at 37°C  
123 in a humidified 5% CO<sub>2</sub> incubator.

124

### 125 **Isolation, amplification and purification of the new Myxoma virus (MYXV Toledo) strain**

126 Samples from lesions of the eyelid and urogenital regions of an Iberian hare (*L. granatensis*)  
127 specimen were manually homogenized. A small volume (5-10 µl) of the processed tissues was  
128 used to inoculate confluent RK13 cells monolayers in a 6-well plate and allowed to incubate at  
129 37°C. At 2 days after infection, distinctive MYXV foci were visualized using a Leica DMI6000 B  
130 inverted microscope. To proceed with the virus isolation, infected cells were harvested, freeze-  
131 thawed at -80°C and 37°C for three times and sonicated for one minute to release the viruses  
132 from infected cells. The virus was inoculated back onto a confluent RK13 cells monolayer in a  
133 150 mm dish and incubated at 37°C for 48 hours. Cells were collected to perform a serial dilution  
134 and the one with the best individualized foci (dilution 10<sup>-5</sup>) was used for inoculating a new 150 mm  
135 dish. After 2 days of infection, a last round of cell harvest, freeze-thaw cycles and sonication was  
136 done before proceeding to virus amplification into twenty 150 mm dishes. Purification of the virus  
137 through a 36% sucrose cushion was performed as described before [13]. Titration of the number  
138 of replicating infectious units of virus was determined by crystal violet foci staining of the infected

139 RK13 cell monolayers, while the total number of viral particles was counted using the NanoSight  
140 NS300 instrument (Malvern Panalytical, USA).

141

#### 142 **Viral nucleic acid extraction, Illumina sequencing and *de novo* assembly of the genome**

143 Total viral nucleic acid was extracted from 200 µl of the viral prep using a phenol-chloroform  
144 extraction protocol as previously described [14]. The viral DNA was used to generate a 2x100 bp  
145 Illumina sequencing library and this was sequenced on a Illumina HiSeq4000 (Illumina, USA) at  
146 Macrogen Inc. (Korea). The paired-end raw reads (40,730,938 reads) were *de novo* assembled  
147 using metaSPAdes v3.12.0 [15] with kmer of 33, 55 and 77. The *de novo* assembled contigs then  
148 assembled into a genome length contigs using MYXV-Lu (GenBank accession # MK836424) as  
149 a scaffold, primarily to resolve the terminals redundancy. The quality of the final assembly was  
150 verified by mapping the raw reads back to the genome using BMap [16].

151

#### 152 **Genome analysis**

153 All MYXV and poxvirus RefSeqs were downloaded from GenBank on the April 9, 2019. Global  
154 alignments of the MYXV with the genome determined in this study were carried out using MAFFT  
155 [17]. ORFs in the genome were determined with ORFfinder  
156 (<https://www.ncbi.nlm.nih.gov/orffinder/>) coupled with a local MYXV ORF database generated  
157 from the MYXV genomes. ORFs that did not have any similarity to MYXV ORFs were analyzed  
158 using BLASTn and BLASTx sequence queries [18]. All pairwise identities (nucleotide and protein)  
159 were calculated using SDV v1.2 [19].

160

161 Protein sequence alignments of the newly derived poxvirus virion protein, thymidine kinase, host  
162 range protein and poly(A) Polymerase subunit were used to inferred maximum likelihood  
163 phylogenetic trees using PHYML 3.0 [20] with substitution models JTT+G, WAG+G+F, JTT+G+F  
164 and JTT+G+F respectively, determined using ProtTest [21]. Branches with aLRT support of <0.8  
165 were collapsed using TreeGraph2 [22].

## 166 **Results and Discussion**

167           The natural host for MYXV is the South American tapeti (South American strains) [2, 4].  
168 As expected from predictions of long-term virus/host co-evolution, MYXV strains are highly  
169 adapted to their natural hosts, causing only benign cutaneous fibromas [4]. However, when  
170 another susceptible host becomes available to the virus transmission system, in this case the  
171 European rabbit (*Oryctolagus cuniculis*), a successful cross-species transmission can occur.  
172 Indeed, when MYXV first entered the European rabbit host, it was immediately pathogenic and  
173 caused close to 100% mortality. After the use of MYXV in the 1950s to control feral rabbit  
174 populations in Australia and Europe, rapid co-evolutionary changes occurred in both rabbit host  
175 and virus, due to increased resistance of rabbit populations and the appearance of less virulent  
176 virus strains [8, 23]. In 2014, a study reported the presence of a myxomatosis-like disease in the  
177 European brown hare (*Lepus europaeus*) [12]. However, a MYXV strain capable of infecting hares  
178 has not been previously genetically characterized. More recently, reports of abnormal mortalities  
179 in Iberian hares were described in the Spanish regions of Andalucía, Castilla-La Mancha,  
180 Extremadura, Madrid and Murcia. The animals found in the hunting grounds presented with  
181 inflammation of the eyelids, conjunctivitis and also inflammation of the perianal area, symptoms  
182 consistent with classic rabbit myxomatosis.

183  
184           In this study, a new MYXV strain (MYXV Toledo) was isolated and sequenced from an  
185 Iberian hare found in Toledo province (Figure 1A, E) that presented the classical lesions of  
186 myxomatosis, including a bilateral blepharitis and conjunctivitis, and a swollen vulvar and anal  
187 region. The basal third of the left ear presented two myxoma-like lesions of 5 mm diameter (Figure  
188 1B). Moreover, epistaxis and strong congestion of the trachea were observed, whereas the lung  
189 was swollen and presented few petechial hemorrhages. Histopathology analysis of the eyelid skin  
190 revealed the typical proliferation and ballooning degeneration of the epidermal cells, containing  
191 single large rare, intracytoplasmic, round and eosinophilic inclusion bodies (Figure 1C). In this  
192 tissue, a severe acanthosis with erosion and ulceration was observed. Blepharoconjunctivitis  
193 lesions were also associated with an inflammatory cell response in the underlying dermis, with  
194 infiltration of large macrophage-like cells, diffuse edema and fibrin deposition (Figure 1D). In the  
195 lung, mild congestion, alveolar edema and hemorrhages were observed. These vascular lesions  
196 were also recorded in the liver and kidneys.

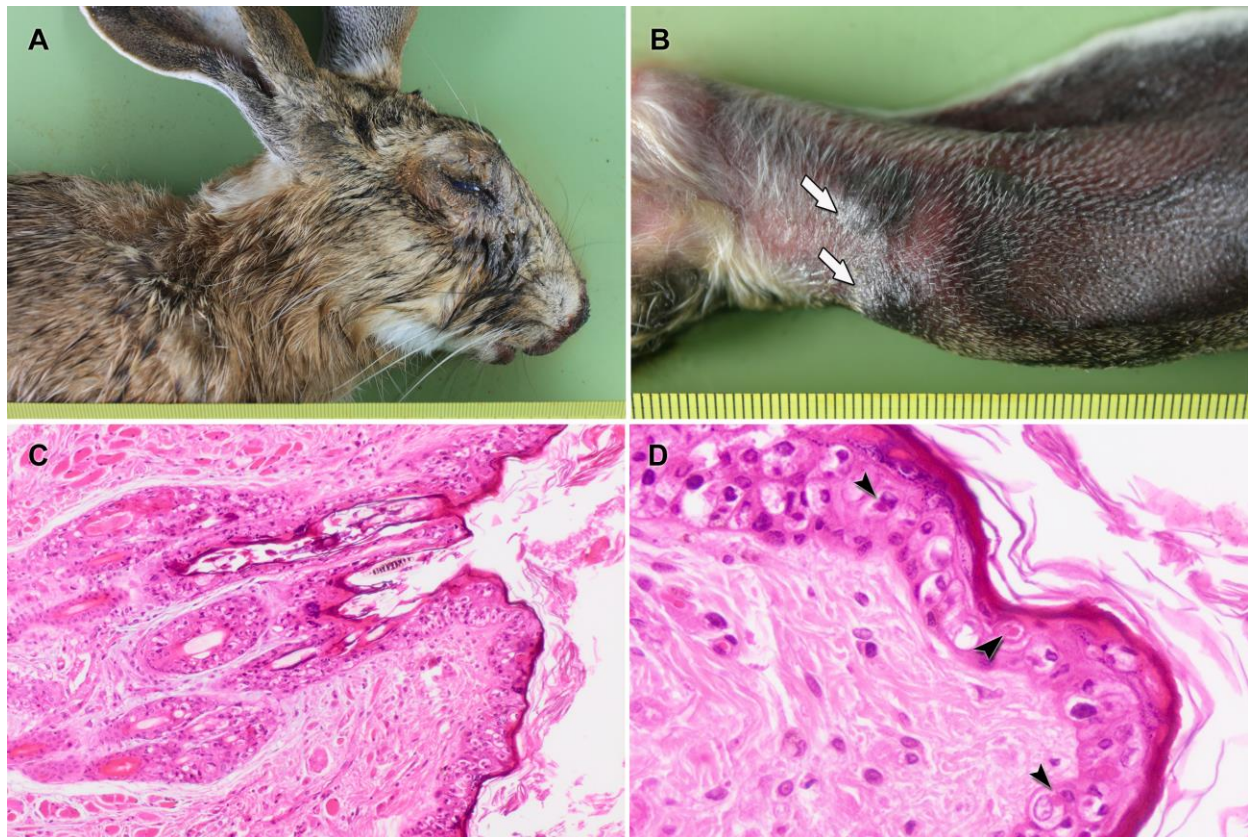

197

198 **Figure 1:** Iberian hare with myxomatosis-compatible lesions. A) Blepharitis and conjunctivitis with  
199 seropurulent discharge. B) Myxomas at the base of the left ear (arrows). C) Severe acanthosis of  
200 the eyelid skin, with hyperkeratosis. D) Ballooning degeneration of the epidermal cells, and  
201 intracytoplasmic eosinophilic inclusion bodies in the eyelid skin (arrowheads).  
202

### 203 Comparison of Lausanne strain with the newly discovered Toledo MYXV strain

204 From the collected samples, a new MYXV strain was isolated which we have named  
205 MYXV Toledo strain (MYXV-To). The *de novo* assembled genome is 164,579 bps. This genome  
206 was aligned to MYXV-Lu strain (GenBank accession # AF170726.2) for preliminary analysis. The  
207 MYXV-To genome (GenBank accession # MK836424) was found to be ~2,800 bp longer than the  
208 one reported for the MYXV-Lu strain (161,777 bp) [24]. Based on the published genome  
209 sequence, the MYXV-Lu strain has a total of 171 genes (12 of which are duplicated in the TIRs  
210 regions) [3, 24] and can be divided into three regions: the terminals, 14.1 kb extending from the  
211 left TIR (*M0005.1L* to *M011L*) and 23.1 kb extending from the right TIR (*M143R* to *M000.5L*)  
212 mostly contain genes involved in the MYXV virulence and host subversion, while the central 124.5  
213 kb region (*M012L* to *M142R*) includes a mixture of virulence genes and essential viral genes  
214 conserved across all poxviruses [2, 25]. Of the 159 different MYXV-Lu strain encoded gene  
215 products, all were ~99% identical to those of the MYXV-To strain, with the exception the ORFs



216 *M009L*, *M152R* and *M036L*. Furthermore, we identified a novel insertion of ~ 2,800 bp within the  
 217 *M009L* gene that spans the 12,236 to the 15,082-bp region of the left end of the MYXV-To genome  
 218 (Figure 2).

219

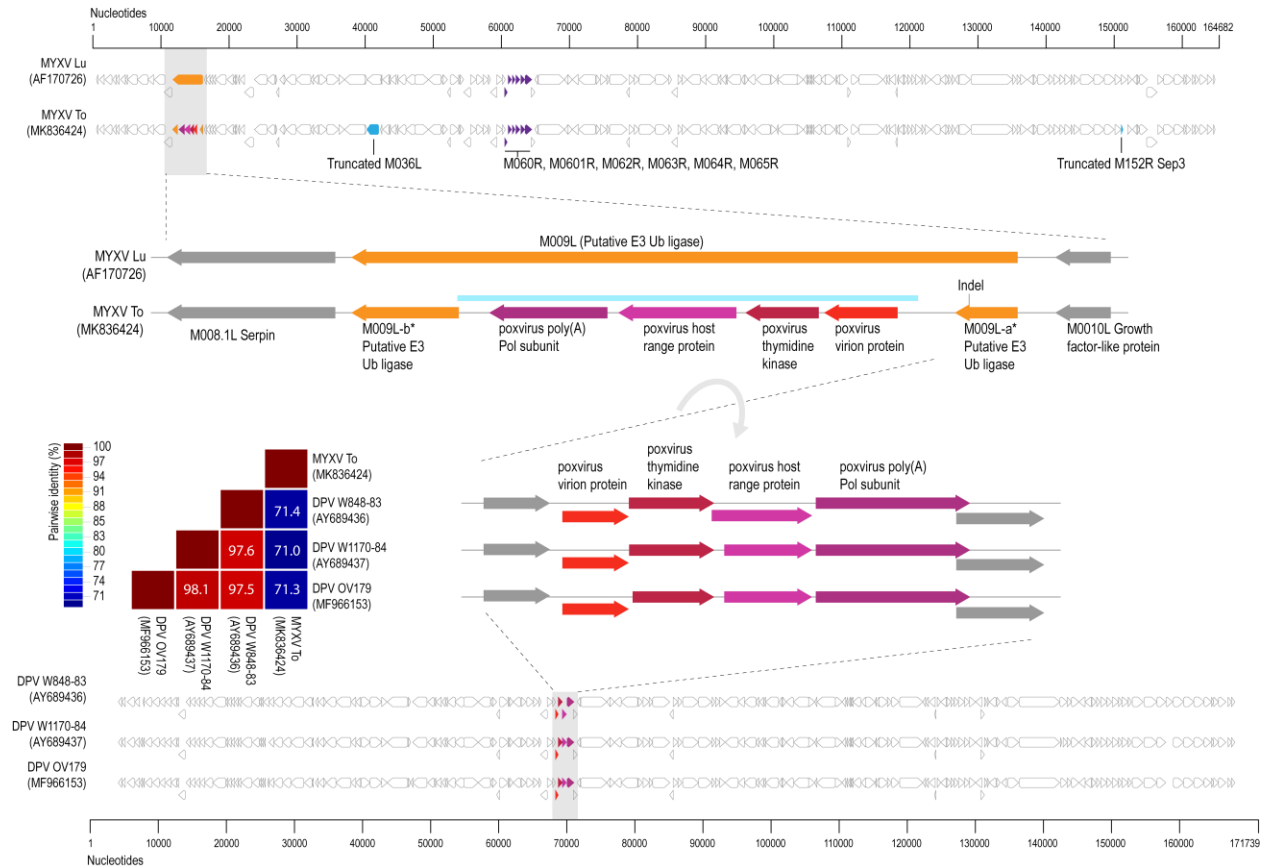

220

221 **Figure 2:** Representation of the genome organization of both MYXV-Lu (AF170726) and MYXV-  
 222 To (MK836424): blue ORF illustrations represent truncated genes; purple show the location of  
 223 *M060R*, *M061R*, *M062R*, *M063R*, *M064R* and *M065R* genes in both MYXV strains, orange shows  
 224 the *M009L* gene (intact in MYXV-Lu and disrupted in MYXV-To) and shades of red, pink and  
 225 purple represent the new genes inserted in MYXV-To strain after a recombinant event. The lower  
 226 panel shows the only three genomes AY689436, AY689437 and MF966153 that also present a  
 227 similar recombinant region. Light grey arrow indicated the inversion of the gene cassette in  
 228 comparison to the three Cervidpoxvirus genomes. A pairwise identity plot with percentage  
 229 pairwise nucleotide identities is provided in colored boxes for the recombinant region found in  
 230 MYXV-To genome with a similar region in the three Cervidpoxvirus genomes (GenBank  
 231 accession #s AY689436, AY689437 and MF966153).

232

### 233 Viral genes disrupted in the new MYXV-To strain

234 As previously reported for MYXV isolates from feral rabbits in Australia and Great Britain,  
 235 single or multiple indels that result in the disruption of ORFs are relatively common [26-28]. In the  
 236 Lausanne strain, *M009L* encodes a putative E3 ubiquitin (Ub) ligase of 509 aa with a N-terminal

237 BTB-BACK domain followed by 4 Kelch motifs [29]. Our genomic analysis reveals that ORF  
238 *M009L* of MYXV-To is disrupted by an insertion of four nucleotides (+TATA, at position 15,586-  
239 bp), causing a frameshift mutation. This indel results in a smaller truncated *M009L* predicted  
240 protein of 148 aa. Several reports show that this same gene is also disrupted in multiple Australian  
241 MYXV strains [28], as well as in the Californian MSW strain [16], which suggest that the disruption  
242 of this gene does not abrogate MYXV survival in the wild. Four additional nucleotides were also  
243 found in the *M036L* gene (+TTTT, position 42,007 bp), thereby creating a premature stop codon  
244 in frame within this gene. *M036L* is an orthologue of the O1 protein that is found in the  
245 orthopoxvirus vaccinia virus (VACV) [28]. However, the function of *M036L* in the MYXV virus is  
246 not reported. A previous study showed that certain MYXV field isolates carry a deletion of 89 nt  
247 in this gene [30]. However, this indel appear to have no major effects in the survival and spread  
248 of MYXV in rabbits [30]. In the MYXV-Lu strain, ORF *M152R* encodes a serine proteinase inhibitor  
249 (Serp3) of 266 aa [31]. In the MYXV-To strain, this gene is disrupted as a result of an insertion of  
250 a single nucleotide (+C, at position 150,688 bp), resulting in the appearance of an early stop  
251 codon. The exact biological function of Serp3 is not known in MYXV. To date, two other serpins  
252 have been identified in MYXV, Serp1 and Serp2 [32], both of which are implicated in the  
253 modulation of host inflammatory responses [33-35]. Phenotypically, the deletion of specific host  
254 range proteins inevitably results in the reduced ability of the resulting virus to infect cells or tissues  
255 of species for which the parental virus was adapted. For this reason, we consider it less likely that  
256 the truncation of *M152R* contributes to the observed virulence of MYXV-To in Iberian hares.

257

## 258 **Analyses of the new recombinant region of the MYXV-To strain**

259 Analyses of the MYXV-To genome sequence revealed an insertion of ~2,800 bp in the left  
260 side of the genome (Figure 2). This new recombinant region encodes at least four genes that are  
261 predicted to encode four viral proteins that are homologous, but not identical, to the poxvirus gene  
262 families exemplified by the *M060R*, *M061R*, *M064R* and *M065R* genes from MYXV. We exploited  
263 sequence similarity searches to predict the functions of these new MYXV-To proteins. According  
264 to the obtained results, the recombinant region encodes a known virion protein (rPox-virion  
265 protein), followed by a thymidine kinase (Recombinant pox virus thymidine kinase; rPox-thymidine  
266 kinase), a C7L-like host range protein (rPox-host range protein) and a poly A polymerase subunit  
267 (rPox-poly(A) Pol subunit) (Figure 2). In the MYXV-Lu genome, the region that spans the locus at  
268 ~57,500 bp include a set of six genes that are present in all MYXV strains (*M060R* to *M065R*) [24,  
269 36]. The predicted functions for the proteins found in the recombinant region are in accordance  
270 to those found in the ~57,500 bp region of other MYXV strains [36]. However, it should be noted

271 that the *M062R* and the *M063R* genes that are present in all MYXV strains are not present in the  
272 new recombinant insertion region at the left end of MYXV-To (Figure 2). A BLASTn-based search  
273 for the complete recombinant region with the new four gene “cassette” revealed that this virus  
274 gene arrangement is only found in genomes (GenBank accession #s AY689436, AY689437 and  
275 MF966153) of cervidpoxviruses, for which it shares ~71% nucleotide identity (Figure 2). These  
276 results suggest that the recombinant region is derived from a new still-unreported poxvirus that  
277 shares a common ancestral origin with cervidpoxviruses. Occurrences of recombination between  
278 leporipoxviruses have been described before. In fact, it was established that the malignant rabbit  
279 fibroma virus (MRV) is a result of a recombination event between two other leporipoxviruses, the  
280 Shope rabbit fibroma virus (SFV) and MYXV [24, 25]. The recombinant MRV was capable of  
281 immunosuppression and fatal malignancy in a broader host range unlike the case of SFV but  
282 more like MYXV [26-29].

283  
284 The rPox-thymidine kinase predicted protein sequence shares ~70% identity to its  
285 homologous protein from leporipoxviruses and 60-65% identity to that of capripoxviruses and  
286 cervidpoxviruses (Figure 3). The rPox-virion protein predicted protein sequence shares 73%  
287 amino acid identity to those of leporipoxviruses and 63-70% with those of centapoxviruses,  
288 capripoxviruses and orthopoxviruses (Figure 4). rPox-poly(A) Pol subunit shares the highest  
289 amino acid pairwise identity (80-86%) with those from capripoxviruses, cervidpoxviruses and  
290 leporipoxviruses (Figure 5). On the other hand, the newly identified rPox-host range protein of  
291 MYXV-To is the least conserved among the proteins found in the recombinant region, sharing  
292 only 35-40% amino acid identity with M064R protein family of centapoxviruses, cervidpoxviruses  
293 and leporipoxviruses (Figure 6). Moreover, it should be noticed that the new rPox-host range  
294 protein also shares ~40% identity to the M062R protein found in MYXV strains and RFV and  
295 ~28% amino acid pairwise identity to the M063R protein, also found in MYXV and SFV. Although  
296 the proteins found in the new recombinant region of MYXV-To share higher pairwise identity to  
297 their homologous versions found in leporipoxviruses, it should be noted that in most cases a small  
298 difference (~5% pairwise identity) segregate them from, for example, centapoxviruses and  
299 cervidpoxviruses. Moreover, and as mentioned before, the new recombinant region only presents  
300 one member of the C7L-like host range gene superfamily. In fact, leporipoxviruses constitute a  
301 unique example in the evolution of this gene family, since they encode three related C7L-like gene  
302 members in tandem, *M062R* and *M063R* and *M064R* [29]. It is suggested that the emergence of  
303 these three C7L-like gene copies in MYXV arose after two events of gene duplication [29]. In our  
304 results, we report that the new recombinant insertion region of MYXV-To only contains one

305 predicted host range protein (Figure 2), which reinforces our hypothesis that this new gene  
 306 insertion region found at the left end of the MYXV-To genome is probably not a result of a  
 307 recombinant event between two leporipoxviruses, but rather between MYXV and a still-  
 308 unidentified poxvirus of ungulates.  
 309

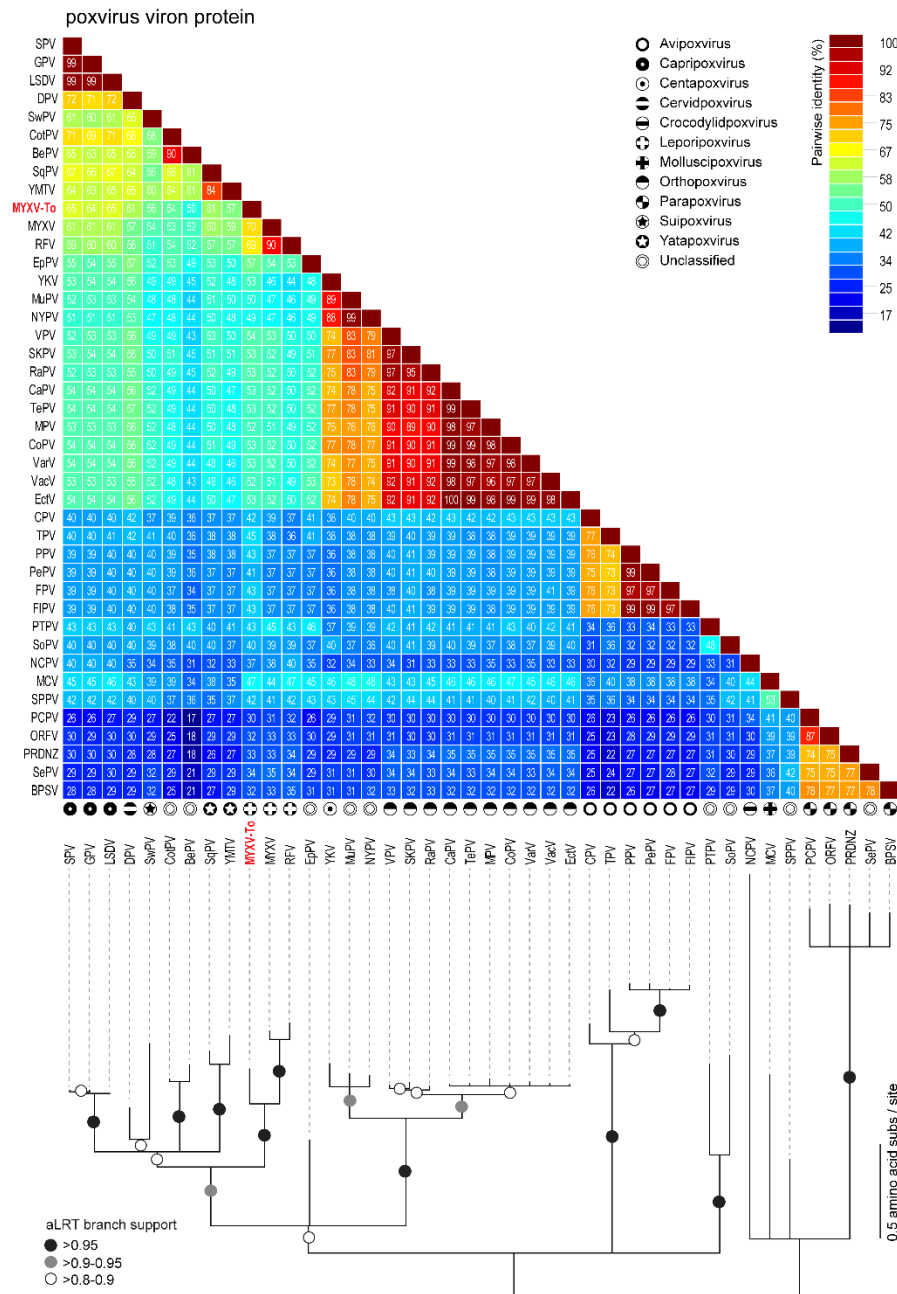

310  
 311 **Figure 3:** Pairwise amino acid identity matrix (upper image) and maximum-likelihood phylogenetic  
 312 tree (model JTT+G) showing the relationships of the rPox-viron protein (highlighted in red) found  
 313 in the recombinant region of MYXV-To strain and its homologous proteins found in representative  
 314 sequences (NCBI RefSeq) of poxvirus. Branches with bootstrap support >95% are indicated with  
 315 black circles whereas branches exhibiting 90%-95% and 80-90% are indicated with grey and

316 white circles, respectively. A list of all sequences and their acronyms used for the pairwise amino  
 317 acid identity matrix and phylogenetic analysis is provided in Table S1.  
 318

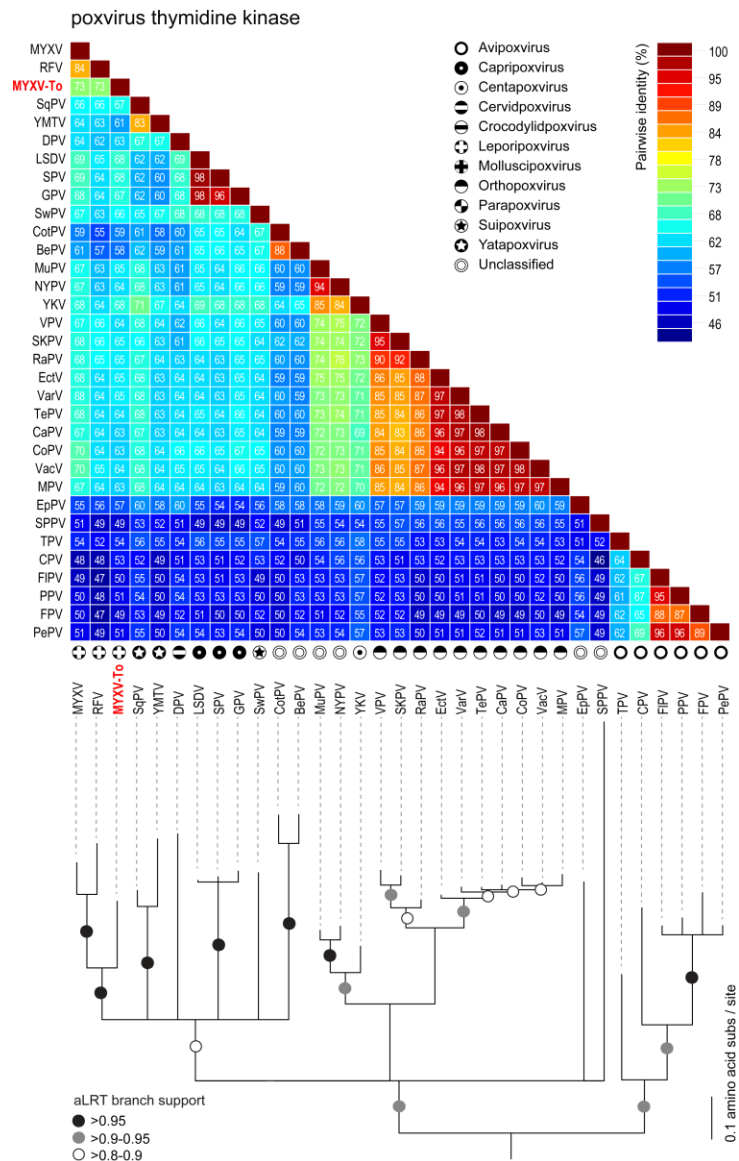

319  
 320 **Figure 4:** Pairwise amino acid identity matrix (upper image) and maximum-likelihood phylogenetic  
 321 tree (model WAG+G+F) showing the relationships of the rPox-thymidine kinase (highlighted in  
 322 red) found in the recombinant region of MYXV-To strain and its homologous proteins found in  
 323 representative sequences (NCBI RefSeq) of poxvirus. Branches with bootstrap support >95% are  
 324 indicated with black circles whereas branches exhibiting 90%-95% and 80-90% are indicated with  
 325 grey and white circles, respectively. A list of all sequences and their acronyms used for the  
 326 pairwise amino acid identity matrix and phylogenetic analysis is provided in Table S1.

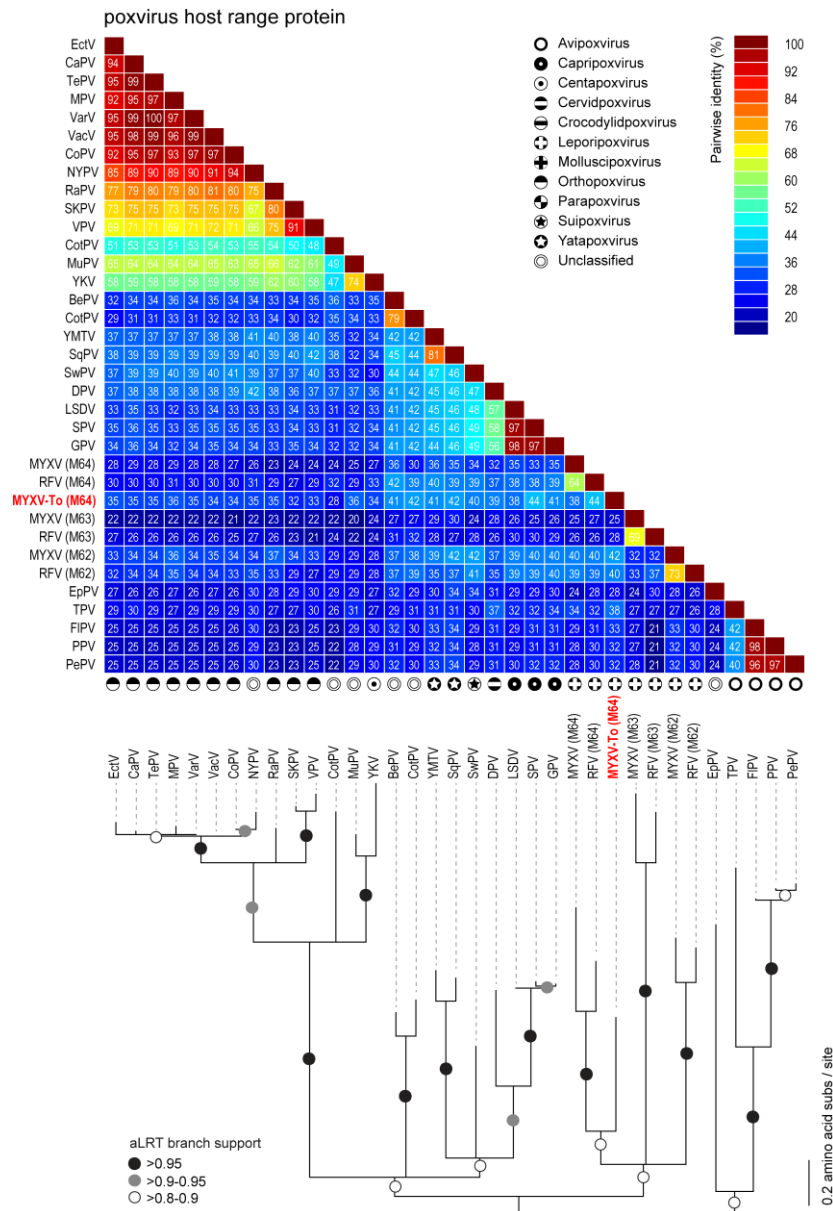

327

328 **Figure 5:** Pairwise amino acid identity matrix (upper image) and maximum-likelihood phylogenetic  
 329 tree (JTT+G+F) showing the relationships of the rPox-host range protein (highlighted in red) found  
 330 in the recombinant region of MYXV-To strain and its homologous proteins found in representative  
 331 sequences (NCBI RefSeq) of poxvirus. Branches with bootstrap support >95% are indicated with  
 332 black circles whereas branches exhibiting 90%-95% and 80-90% are indicated with grey and  
 333 white circles, respectively. A list of all sequences and their acronyms used for the pairwise amino  
 334 acid identity matrix and phylogenetic analysis is provided in Table S1.

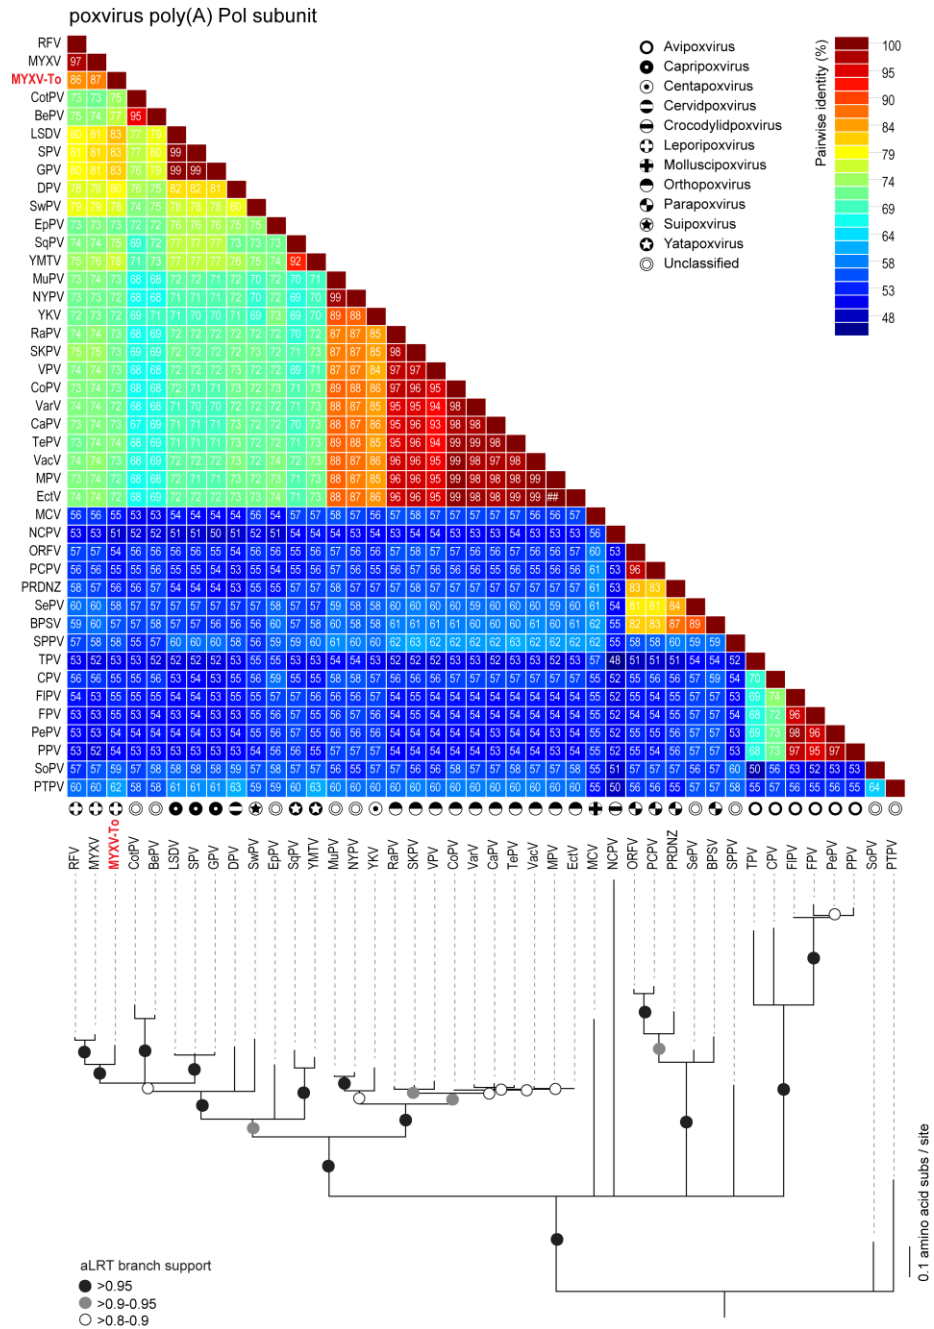

335  
336  
337  
338  
339  
340  
341  
342  
343  
344

**Figure 6:** Pairwise amino acid identity matrix (upper image) and maximum-likelihood phylogenetic tree (model JTT+G+F) showing the relationships of the rPox-poly(A) Pol subunit (highlighted in red) found in the recombinant region of MYXV-To strain and its homologous proteins found in representative sequences (NCBI RefSeq) of poxvirus. Branches with bootstrap support >95% are indicated with black circles whereas branches exhibiting 90%-95% and 80%-90% are indicated with grey and white circles, respectively. A list of all sequences and their acronyms used for the pairwise amino acid identity matrix and phylogenetic analysis is provided in Table S1.

## 345 **Concluding remarks**

346 Other than the disruption of *M009L*, *M036L* and *M152R*, the MYXV-To strain has a full  
347 complement of genes present in other MYXV isolates and strains. So the question arises of how  
348 MYXV-To, with a new recombination insertion region derived from an unreported cervid-like  
349 poxvirus, became highly pathogenic in Iberian hares. Examination of the four new poxvirus genes  
350 found in the recombinant “cassette” at the left end of the MYXV-To genome, these may induce  
351 factor(s) that mediate host range and/or immunosuppression in hares, allowing the increased  
352 infection and propagation of this new virus in hares. Regarding virulence in hares, it is likely that  
353 acquisition of new genes involved in immunosuppression and/or host-range functions in specific  
354 cell types might have a preponderant role in this apparent species leaping of MYXV-To [37]. From  
355 the four new genes present in the recombinant insertion region, rPoxhost range protein is the  
356 clear candidate that suggests a possible function in novel host interactions for this new  
357 recombinant poxvirus. As mentioned before, in Lausanne strain M064R belong to the C7L-like  
358 host range factor superfamily that are known to be important for MYXV pathogenesis [38-40].  
359 However, since this *M064R-like* gene of MYXV-To shares relatively low similarity (~40%) to its  
360 orthologous proteins found in other leporipoxviruses, it is likely that this new protein has acquired  
361 new roles, perhaps reflected by alternative host targets, compared to those in known MYXV  
362 strains. Host range proteins are defined as a group of virus-produced proteins important for the  
363 capacity of virus to infect cells or tissues of certain species [41]. The capacity of direct  
364 engagement and modulation of the host antiviral responses highlight the constant pressures  
365 exerted by the co-evolutionary arms race between host and viral pathogens [41, 42]. In fact, the  
366 high divergence observed in the new rPox-host range protein in MYXV-To might suggest that the  
367 parental virus from which this recombinant region was donated is able to replicate within a  
368 completely different host species that has a unique repertoire of anti-viral response pathways.  
369 This might ultimately result in a new poxvirus strain capable of differentially modulating the anti-  
370 viral responses of hare cells compared to MYXV, playing a critical role in species leaping and  
371 virus pathogenicity in the new host. Nevertheless, the biological implications of the new genes  
372 found in the recombination “cassette” still need to be experimentally addressed.

373

374 The data presented in this paper report that MYXV-To strain is a result of a recombinant  
375 event between a MYXV virus and a still-unreported poxvirus that shares common ancestral  
376 sequences to cervidpoxviruses. Recent reports genetically characterized a large number of  
377 European and Australian strain MYXV genomic sequences [4, 26]. Haplotypes are usually  
378 suitable for tracking the spread of MYXV virus [43]. However, the discrimination of alterations in



379 MYXV genomes that are responsible for increased virulence grades or attenuated phenotypes is  
380 still a complicated task. While it is not yet understood what precise mechanisms allowed the  
381 MYXV-To apparently acquired virulence and species leap into Iberian hares, the genetic  
382 characterization of this novel MYXV-To strain, in combination with further studies of the proteins  
383 found in the new recombinant insertion region, will provide the foundation to a better  
384 understanding of this cross-species transmission.

385

386 **GenBank Accession #:** MK836424

387

### 388 **Supplementary Material captions**

389 **Figure S1:** After performing a serial dilution of the purified MYXV-To virus, RK13 cells were  
390 infected and incubated for 48 hours at 37°C. At 2 days post infection, a typical MYXV cytopathic  
391 effect (foci formation) was visualized using a Leica DMI6000 B inverted microscope at 10x (A)  
392 and 20x (B).

393

394 **Figure S2:** Posterior mapping of the Illumina sequencing read to the genome of MYXV-To using  
395 BBmap [16].

396

397 **Table S1:** List of representative genomes of Poxvirus (NCBI RefSeq) used for the pairwise amino  
398 acid identity matrix and phylogenetic analysis.

399

### 400 **Acknowledgements**

401 All animal sampling took place post-mortem. According to EU and National legislation  
402 (2010/63/UE Directive and Spanish Royal Decree (53/2013) and to the University of Castilla–La  
403 Mancha guidelines, no permission or consent is required to conduct the research reported herein.

404 FCT - Foundation for Science and Technology supported the doctoral fellowship of AAP  
405 446 (ref. SFRH/BD/128752/2017) and the investigator grant of PJE (IF/00376/2015). This 447  
406 article is a result of the project NORTE-01-0145-FEDER-000007, supported by Norte 448  
407 Portugal Regional Operational Programme (NORTE2020), under the PORTUGAL 2020 449  
408 Partnership Agreement, through the European Regional Development Fund (ERDF). This work  
409 is also supported by National Institute of Health (NIH) grants R01 A1080607.

410

### 411 **Author contributions**

412 Conceptualization, PJE and AV; Methodology, AAP, AV, MB, SK and MAR; Formal Analysis, AV  
413 and AAP; Resources, PJE, CG and GM; Data Curation, AV and SK; Writing - Original Draft  
414 Preparation, AAP, ALM and PJE; Writing – Review & Editing, AV, PJE, GM and CG; Data  
415 visualization, AAP and AV; Supervision, PJE, AV and GM; Project Administration, AV and PJE;  
416 Funding Acquisition, PJE and GM.

417

418 **Conflicts of Interest**

419 The authors declare no conflict of interest.

## 420 References

- 421 1. Fenner, F.; Ratcliffe, F. N., Myxomatosis. *Myxomatosis*. **1965**.
- 422 2. Kerr, P.; Liu, J.; Cattadori, I.; Ghedin, E.; Read, A.; Holmes, E., Myxoma virus and the  
423 Leporipoxviruses: an evolutionary paradigm. *Viruses* **2015**, 7, (3), 1020-1061.
- 424 3. Stanford, M. M.; Werden, S. J.; McFadden, G., Myxoma virus in the European rabbit:  
425 interactions between the virus and its susceptible host. *Veterinary research* **2007**, 38, (2),  
426 299-318.
- 427 4. Kerr, P. J., Myxomatosis in Australia and Europe: A model for emerging infectious  
428 diseases. *Antiviral Research* **2012**, 93, (3), 387-415.
- 429 5. Wilkinson, L., Biological control of vertebrate pests: the history of myxomatosis, an  
430 experiment in evolution. *Med. Hist.* **2001**, 45, (1), 139-140.
- 431 6. Ross, J.; Sanders, M. F., The development of genetic resistance to myxomatosis in wild  
432 rabbits in Britain. *The Journal of hygiene* **1984**, 92, (3), 255-261.
- 433 7. Marshall, I. D.; Fenner, F., Studies in the epidemiology of infectious myxomatosis of  
434 rabbits. V. Changes in the innate resistance of Australian wild rabbits exposed to  
435 myxomatosis. *The Journal of hygiene* **1958**, 56, (2), 288-302.
- 436 8. Alves, J. M.; Carneiro, M.; Cheng, J. Y.; Lemos de Matos, A.; Rahman, M. M.; Loog, L.;  
437 Campos, P. F.; Wales, N.; Eriksson, A.; Manica, A.; Strive, T.; Graham, S. C.; Afonso, S.;  
438 Bell, D. J.; Belmont, L.; Day, J. P.; Fuller, S. J.; Marchandeu, S.; Palmer, W. J.; Queney,  
439 G.; SurrIDGE, A. K.; Vieira, F. G.; McFadden, G.; Nielsen, R.; Gilbert, M. T. P.; Esteves, P.  
440 J.; Ferrand, N.; Jiggins, F. M., Parallel adaptation of rabbit populations to myxoma virus.  
441 *Science* **2019**, 363, (6433), 1319-1326.
- 442 9. Regnery, D. C.; Marshall, I. D., Studies in the epidemiology of myxomatosis in California:  
443 Iv. The susceptibility of six leporid species to Californian myxoma virus and the relative  
444 infectivity of their tumors for mosquitoes. *American journal of epidemiology* **1971**, 94, (5),  
445 508-513.
- 446 10. Regnery, D. C., The epidemic potential of Brazilian myxoma virus (Lausanne strain) for  
447 three species of North American cottontails. *American Journal of Epidemiology* **1971**, 94,  
448 (5), 514-519.
- 449 11. Collins, J., Myxomatosis in the common hare. *Irish Veterinary Journal* **1955**, 9, 268.
- 450 12. Barlow, A.; Lawrence, K.; Everest, D.; Dastjerdi, A.; Finnegan, C.; Steinbach, F.,  
451 Confirmation of myxomatosis in a European brown hare in Great Britain. *Myxomatosis*  
452 **2014**, 175, (3), 75-76.
- 453 13. Smallwood, S. E.; Rahman, M. M.; Smith, D. W.; McFadden, G., Myxoma Virus:  
454 Propagation, Purification, Quantification, and Storage. *Current Protocols in Microbiology*  
455 **2010**, 17, (1), 14A.1.1-14A.1.20.
- 456 14. Di Pietro, F.; Ortenzi, F.; Tilio, M.; Concetti, F.; Napolioni, V., Genomic DNA extraction  
457 from whole blood stored from 15- to 30-years at -20 °C by rapid phenol-chloroform  
458 protocol: A useful tool for genetic epidemiology studies. *Molecular and Cellular Probes*  
459 **2011**, 25, (1), 44-48.
- 460 15. Bankevich, A.; Nurk, S.; Antipov, D.; Gurevich, A. A.; Dvorkin, M.; Kulikov, A. S.; Lesin, V.  
461 M.; Nikolenko, S. I.; Pham, S.; Pribelski, A. D.; Pyshkin, A. V.; Sirotkin, A. V.; Vyahhi, N.;  
462 Tesler, G.; Alekseyev, M. A.; Pevzner, P. A., SPAdes: a new genome assembly algorithm  
463 and its applications to single-cell sequencing. *Journal of computational biology : a journal*  
464 *of computational molecular cell biology* **2012**, 19, (5), 455-477.
- 465 16. Bushnell, B., *BBMap short-read aligner, and other bioinformatics tools*. 2015.
- 466 17. Nakamura, T.; Tomii, K.; Yamada, K. D.; Katoh, K., Parallelization of MAFFT for large-  
467 scale multiple sequence alignments. *Bioinformatics* **2018**, 34, (14), 2490-2492.
- 468 18. Altschul, S. F.; Gish, W.; Miller, W.; Myers, E. W.; Lipman, D. J., Basic local alignment  
469 search tool. *Journal of Molecular Biology* **1990**, 215, (3), 403-410.

- 470 19. Muhire, B. M.; Varsani, A.; Martin, D. P., SDT: A Virus Classification Tool Based on  
471 Pairwise Sequence Alignment and Identity Calculation. *PLOS ONE* **2014**, 9, (9), e108277.
- 472 20. Guindon, S.; Dufayard, J.-F.; Lefort, V.; Anisimova, M.; Hordijk, W.; Gascuel, O., New  
473 Algorithms and Methods to Estimate Maximum-Likelihood Phylogenies: Assessing the  
474 Performance of PhyML 3.0. *Systematic Biology* **2010**, 59, (3), 307-321.
- 475 21. Darriba, D.; Taboada, G. L.; Doallo, R.; Posada, D., ProtTest 3: fast selection of best-fit  
476 models of protein evolution. *Bioinformatics (Oxford, England)* **2011**, 27, (8), 1164-1165.
- 477 22. Stöver, B. C.; Müller, K. F., TreeGraph 2: Combining and visualizing evidence from  
478 different phylogenetic analyses. *BMC Bioinformatics* **2010**, 11, (1), 7.
- 479 23. Kerr, P. J.; Cattadori, I. M.; Liu, J.; Sim, D. G.; Dodds, J. W.; Brooks, J. W.; Kennett, M. J.;  
480 Holmes, E. C.; Read, A. F., Next step in the ongoing arms race between myxoma virus  
481 and wild rabbits in Australia is a novel disease phenotype. *Proceedings of the National  
482 Academy of Sciences* **2017**, 114, (35), 9397-9402.
- 483 24. Cameron, C.; Hota-Mitchell, S.; Chen, L.; Barrett, J.; Cao, J.-X.; Macaulay, C.; Willer, D.;  
484 Evans, D.; McFadden, G., The complete DNA sequence of myxoma virus. *Virology* **1999**,  
485 264, (2), 298-318.
- 486 25. Barrett, J. W.; McFadden, G., Genus *Leporipoxvirus*. In *Poxviruses*, Mercer, A. A.;  
487 Schmidt, A.; Weber, O., Eds. Birkhäuser Basel: Basel, 2007; pp 183-201.
- 488 26. Kerr, P. J.; Rogers, M. B.; Fitch, A.; DePasse, J. V.; Cattadori, I. M.; Twaddle, A. C.;  
489 Hudson, P. J.; Tschärke, D. C.; Read, A. F.; Holmes, E. C.; Ghedin, E., Genome Scale  
490 Evolution of Myxoma Virus Reveals Host-Pathogen Adaptation and Rapid Geographic  
491 Spread. *Journal of Virology* **2013**, 87, (23), 12900-12915.
- 492 27. Kerr, P. J.; Ghedin, E.; DePasse, J. V.; Fitch, A.; Cattadori, I. M.; Hudson, P. J.; Tschärke,  
493 D. C.; Read, A. F.; Holmes, E. C., Evolutionary history and attenuation of myxoma virus  
494 on two continents. *PLoS pathogens* **2012**, 8, (10), e1002950-e1002950.
- 495 28. Kerr, P. J.; Cattadori, I. M.; Rogers, M. B.; Fitch, A.; Geber, A.; Liu, J.; Sim, D. G.; Boag,  
496 B.; Eden, J.-S.; Ghedin, E.; Read, A. F.; Holmes, E. C., Genomic and phenotypic  
497 characterization of myxoma virus from Great Britain reveals multiple evolutionary  
498 pathways distinct from those in Australia. *PLoS pathogens* **2017**, 13, (3), e1006252-  
499 e1006252.
- 500 29. Liu, J.; Rothenburg, S.; McFadden, G., The poxvirus C7L host range factor superfamily.  
501 *Current opinion in virology* **2012**, 2, (6), 764-772.
- 502 30. Saint, K.; French, N.; Kerr, P., Genetic variation in Australian isolates of myxoma virus: an  
503 evolutionary and epidemiological study. *Archives of virology* **2001**, 146, (6), 1105-1123.
- 504 31. Guerin, J.-L.; Gelfi, J.; Camus, C.; Delverdier, M.; Whisstock, J. C.; Amardeihl, M.-F.; Py,  
505 R.; Bertagnoli, S.; Messud-Petit, F., Characterization and functional analysis of Serp3: a  
506 novel myxoma virus-encoded serpin involved in virulence. *Journal of General Virology*  
507 **2001**, 82, (6), 1407-1417.
- 508 32. Upton, C.; Macen, J.; Wishart, D.; McFadden, G., Myxoma virus and malignant rabbit  
509 fibroma virus encode a serpin-like protein important for virus virulence. *Virology* **1990**, 179,  
510 (2), 618-631.
- 511 33. Viswanathan, K.; Liu, L.; Vaziri, S.; Dai, E.; Richardson, J.; Togonu-Bickersteth, B.;  
512 Vatsya, P.; Christov, A.; Lucas, A. R., Myxoma viral serpin, Serp-1, a unique interceptor  
513 of coagulation and innate immune pathways. *Thrombosis and haemostasis* **2006**, 95, (03),  
514 499-510.
- 515 34. Macen, J. L.; Upton, C.; Nation, N.; McFadden, G., SERP1, a Serine Proteinase Inhibitor  
516 Encoded by Myxoma Virus, Is a Secreted Glycoprotein That Interferes with Inflammation.  
517 *Virology* **1993**, 195, (2), 348-363.
- 518 35. Messud-Petit, F.; Gelfi, J.; Delverdier, M.; Amardeilh, M.-F.; Py, R.; Sutter, G.; Bertagnoli,  
519 S., Serp2, an Inhibitor of the Interleukin-1 $\beta$ -Converting Enzyme, Is Critical in the  
520 Pathobiology of Myxoma Virus. *Journal of Virology* **1998**, 72, (10), 7830-7839.

- 521 36. Kerr, P. J.; Rogers, M. B.; Fitch, A.; Depasse, J. V.; Cattadori, I. M.; Hudson, P. J.;  
522 Tscharke, D. C.; Holmes, E. C.; Ghedin, E., Comparative analysis of the complete genome  
523 sequence of the California MSW strain of myxoma virus reveals potential host adaptations.  
524 *Journal of virology* **2013**, 87, (22), 12080-12089.
- 525 37. Peng, C.; Haller, S. L.; Rahman, M. M.; McFadden, G.; Rothenburg, S., Myxoma virus  
526 M156 is a specific inhibitor of rabbit PKR but contains a loss-of-function mutation in  
527 Australian virus isolates. *Proceedings of the National Academy of Sciences of the United*  
528 *States of America* **2016**, 113, (14), 3855-3860.
- 529 38. Liu, J.; Wennier, S.; Zhang, L.; McFadden, G., M062 Is a Host Range Factor Essential for  
530 Myxoma Virus Pathogenesis and Functions as an Antagonist of Host SAMD9 in Human  
531 Cells. *Journal of Virology* **2011**, 85, (7), 3270-3282.
- 532 39. Liu, J.; Wennier, S.; Moussatche, N.; Reinhard, M.; Condit, R.; McFadden, G., Myxoma  
533 Virus M064 Is a Novel Member of the Poxvirus C7L Superfamily of Host Range Factors  
534 That Controls the Kinetics of Myxomatosis in European Rabbits. *Journal of Virology* **2012**,  
535 86, (9), 5371-5375.
- 536 40. Barrett, J. W.; Shun Chang, C.; Wang, G.; Werden, S. J.; Shao, Z.; Barrett, C.; Gao, X.;  
537 Belsito, T. A.; Villeneuve, D.; McFadden, G., Myxoma virus *M063R* is a host range gene  
538 essential for virus replication in rabbit cells. *Virology* **2007**, 361, (1), 123-132.
- 539 41. Werden, S. J.; Rahman, M. M.; McFadden, G., Poxvirus Host Range Genes. In *Advances*  
540 *in Virus Research*, Academic Press: 2008; Vol. 71, pp 135-171.
- 541 42. Oliveira, G.; Rodrigues, R.; Lima, M.; Drumond, B.; Abrahão, J., Poxvirus host range  
542 genes and virus–host spectrum: a critical review. *Viruses* **2017**, 9, (11), 331.
- 543 43. Merchant, J. C.; Kerr, P. J.; Simms, N. G.; Robinson, A. J., Monitoring the spread of  
544 myxoma virus in rabbit *Oryctolagus cuniculus* populations on the southern tablelands of  
545 New South Wales, Australia. I. Natural occurrence of myxomatosis. *Epidemiology and*  
546 *infection* **2003**, 130, (1), 113-121.

| Family     | Subfamily        | Genus              | Species                                 | Virus name(s)                           | Virus name abbreviation(s) | Virus isolate designation | Virus GENBANK accession | Virus REFSEQ accession |
|------------|------------------|--------------------|-----------------------------------------|-----------------------------------------|----------------------------|---------------------------|-------------------------|------------------------|
| Poxviridae | Chordopoxvirinae | Avipoxvirus        | Canarypox virus                         | canarypox virus                         | CPV                        | Wheatley C93              | AY318871                | NC_005309              |
| Poxviridae | Chordopoxvirinae | Avipoxvirus        | Fowlpox virus                           | fowlpox virus                           | FPV                        | virulent                  | AF198100                | NC_002188              |
| Poxviridae | Chordopoxvirinae | Avipoxvirus        | Pigeonpox virus                         | pigeonpox virus                         | PPV                        | FeP2                      | KJ801920                | NC_024447              |
| Poxviridae | Chordopoxvirinae | Avipoxvirus        | Turkeypox virus                         | turkeypox virus                         | TPV                        | HUii24-2011               | KP728110                | NC_028238              |
| Poxviridae | Chordopoxvirinae | Capripoxvirus      | Goatpox virus                           | goatpox virus                           | GPV                        | Pellor                    | AY077835                | NC_004003              |
| Poxviridae | Chordopoxvirinae | Capripoxvirus      | Lumpy skin disease virus                | lumpy skin disease virus                | LSDV                       | Neethling 2490            | AF325528                | NC_003027              |
| Poxviridae | Chordopoxvirinae | Capripoxvirus      | Sheeppox virus                          | sheeppox virus                          | SPV                        | TU-V02127                 | AY077832                | NC_004002              |
| Poxviridae | Chordopoxvirinae | Centapoxvirus      | Yokapox virus                           | yokapox virus                           | YKV                        | DakArB 4268               | HQ849551                | NC_015960              |
| Poxviridae | Chordopoxvirinae | Cervidpoxvirus     | Mule deerpox virus                      | mule deerpox virus                      | DPV                        | W-848-83                  | AY689436                | NC_006966              |
| Poxviridae | Chordopoxvirinae | Crocodylidpoxvirus | Nile crocodilepox virus                 | Nile crocodilepox virus                 | NCPV                       | Zimbabwe                  | DQ356948                | NC_008030              |
| Poxviridae | Chordopoxvirinae | Leporipoxvirus     | Myxoma virus                            | myxoma virus                            | MyxV                       | Lausanne                  | AF170726                | NC_001132              |
| Poxviridae | Chordopoxvirinae | Leporipoxvirus     | Rabbit fibroma virus                    | rabbit fibroma virus                    | RFV                        | Kasza                     | AF170722                | NC_001266              |
| Poxviridae | Chordopoxvirinae | Molluscipoxvirus   | Molluscum contagiosum virus             | Molluscum contagiosum virus             | MCV                        | subtype 1                 | U60315                  | NC_001731              |
| Poxviridae | Chordopoxvirinae | Orthopoxvirus      | Camelpox virus                          | camelpox virus                          | CaPV                       | M-96                      | AF438165                | NC_003391              |
| Poxviridae | Chordopoxvirinae | Orthopoxvirus      | Cowpox virus                            | cowpox virus                            | CoPV                       | Brighton Red              | AF482758                | NC_003663              |
| Poxviridae | Chordopoxvirinae | Orthopoxvirus      | Ectromelia virus                        | ectromelia virus                        | EctV                       | Moscow                    | AF012825                | NC_004105              |
| Poxviridae | Chordopoxvirinae | Orthopoxvirus      | Monkeypox virus                         | monkeypox virus                         | MPV                        | Zaire-96-I-16             | AF380138                | NC_003310              |
| Poxviridae | Chordopoxvirinae | Orthopoxvirus      | Raccoonpox virus                        | raccoonpox virus                        | RaPV                       | Herman                    | KP143769                | NC_027213              |
| Poxviridae | Chordopoxvirinae | Orthopoxvirus      | Skunkpox virus                          | skunkpox virus                          | SKPV                       | WA                        | KU749310                | NC_031038              |
| Poxviridae | Chordopoxvirinae | Orthopoxvirus      | Taterapox virus                         | taterapox virus                         | TePV                       | Dahomey 1968              | DQ437594                | NC_008291              |
| Poxviridae | Chordopoxvirinae | Orthopoxvirus      | Vaccinia virus                          | vaccinia virus                          | VacV                       | Western Reserve           | AY243312                | NC_006998              |
| Poxviridae | Chordopoxvirinae | Orthopoxvirus      | Variola virus                           | variola virus                           | VarV                       | Ind3                      | X69198                  | NC_001611              |
| Poxviridae | Chordopoxvirinae | Orthopoxvirus      | Volepox virus                           | volepox virus                           | VPXV                       | CA                        | KU749311                | NC_031033              |
| Poxviridae | Chordopoxvirinae | Parapoxvirus       | Bovine papular stomatitis virus         | bovine papular stomatitis virus         | BPSV                       | ORFB                      | AY386265                | NC_005337              |
| Poxviridae | Chordopoxvirinae | Parapoxvirus       | Orf virus                               | orf virus                               | ORFV                       | ORFD                      | AY386264                | NC_005336              |
| Poxviridae | Chordopoxvirinae | Parapoxvirus       | Parapoxvirus of red deer in New Zealand | parapoxvirus of red deer in New Zealand | PRDNZ                      | HL953                     | KM502564                | NC_025963              |
| Poxviridae | Chordopoxvirinae | Parapoxvirus       | Pseudocowpox virus                      | pseudocowpox virus                      | PCPV                       | VR634                     | GQ329670                | NC_013804              |
| Poxviridae | Chordopoxvirinae | Suipoxvirus        | Swinepox virus                          | swinepox virus                          | SwPV                       | 17077-99                  | AF410153                | NC_003389              |
| Poxviridae | Chordopoxvirinae |                    | Tanapox virus                           | tanapox virus                           | SqPV                       |                           | AJ293568                | NC_002642              |
| Poxviridae | Chordopoxvirinae | Yatapoxvirus       | Yaba monkey tumor virus                 | yaba monkey tumor virus                 | YMTV                       |                           | AY386371                | NC_005179              |
| Poxviridae | Chordopoxvirinae |                    | Pteropox virus                          | pteropox virus                          | PTPV                       | Australia                 | KU980965                | NC_030656              |
| Poxviridae | Chordopoxvirinae |                    | Squirrelpox virus                       | squirrelpox virus                       | SPPV                       | Red squirrel UK           | HE601899                | NC_022563              |

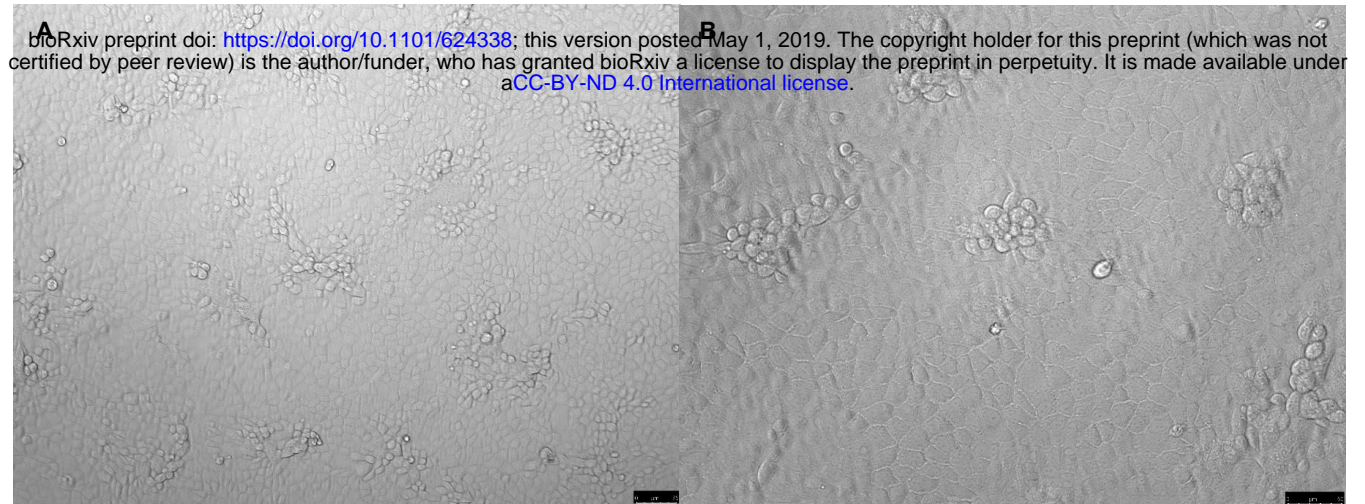

Figure S1: After performing a serial dilution of the purified MYXV-To virus, RK13 cells were infected and incubated for 48 hours at 37°C. At 2 days post infection, a typical MYXV cytopathic effect (foci formation) was visualized using a Leica DMI6000 B inverted microscope at 10x (A) and 20x (B).

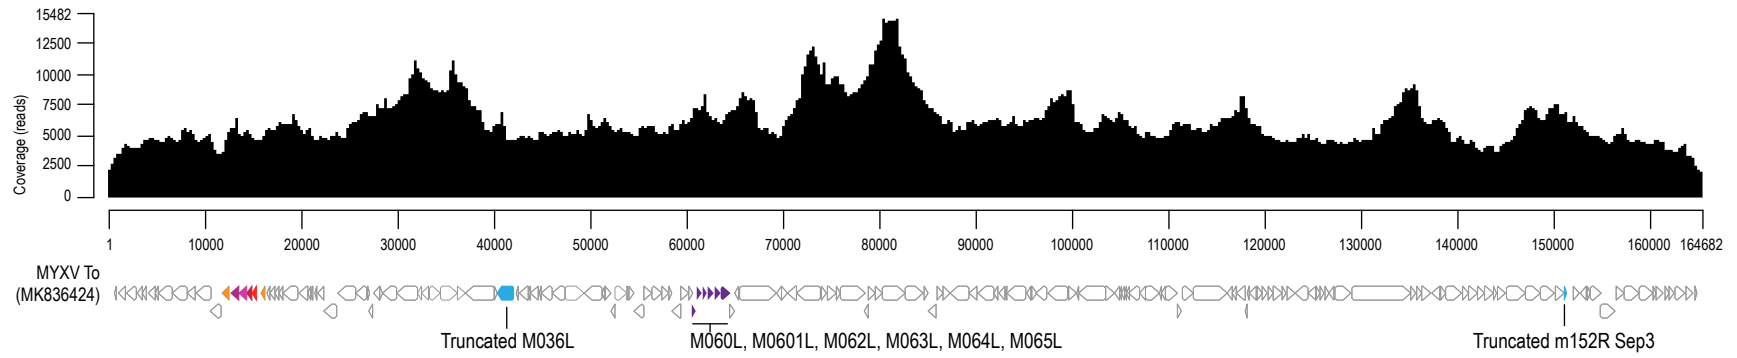

Figure S2: Posterior mapping of the Illumina sequencing read to the genome of MYXV-To using BBmap [16].
